## Correction

# Correction: Comparison of Hepatocellular Carcinoma miRNA Expression Profiling as Evaluated by Next Generation Sequencing and Microarray

## The PLOS ONE Staff

In Table 2, the headings Tumor and Control are incorrectly swapped in the second column and in the second row. Please see the corrected Table 2 here.

**Table 2.** Performance of discrimination between 14 HCC samples and 6 normal tissue samples using miRNA expression obtained by NGS analysis.

|            |         | Result |         |
|------------|---------|--------|---------|
|            |         | Tumor  | Control |
| Prediction | Tumor   | 12     | 0       |
|            | Control | 2      | 6       |

doi:10.1371/journal.pone.0106314t002

## Reference

1. Murakami Y, Tanahashi T, Okada R, Toyoda H, Kumada T, et al. (2014) Comparison of Hepatocellular Carcinoma miRNA Expression Profiling as Evaluated by Next Generation Sequencing and Microarray. PLoS ONE 9(9): e106314. doi:10.1371/journal.pone.0106314

**Citation:** The PLOS ONE Staff (2014) Correction: Comparison of Hepatocellular Carcinoma miRNA Expression Profiling as Evaluated by Next Generation Sequencing and Microarray. PLoS ONE 9(12): e116434. doi:10.1371/journal.pone.0116434

**Published:** December 19, 2014

**Copyright:** © 2014 The PLOS ONE Staff. This is an open-access article distributed under the terms of the Creative Commons Attribution License, which permits unrestricted use, distribution, and reproduction in any medium, provided the original author and source are credited.
